# Supplementary material for: Infant cortex responds to other humans from shortly after birth
Source: PubMed Central journal article supplement (PMC3790196; doi:10.1038/srep02851), 2013-10-04
Supplement: srep02851-s1.pdf [file srep02851-s1.pdf]

## **Infant cortex responds to other humans from shortly after birth**

Teresa Farroni<sup>1,3</sup>, Antonio Chiarelli<sup>2</sup>, Sarah Lloyd-Fox<sup>3</sup>, Stefano Massaccesi<sup>4</sup>, Arcangelo Merla<sup>2</sup>,  
Valentina Di Gangi<sup>1</sup>, Tania Mattarello<sup>1</sup>, Dino Faraguna<sup>5,6</sup>, Mark H. Johnson<sup>3</sup>.

<sup>1</sup>*Dipartimento di Psicologia dello Sviluppo e della Socializzazione, Università di Padova, Padova, Italy,*

<sup>2</sup>*Infrared Imaging Lab. ITAB -Institute of Advanced Biomedical Technologies and Dept. of Neuroscience and Imaging, University of Chieti-Pescara, Italy,*

<sup>3</sup>*Centre for Brain and Cognitive Development, Birkbeck, University of London, United Kingdom,*

<sup>4</sup>*Dipartimento di Psicologia, Università di Padova, Padova, Italy,*

<sup>5</sup>*Dipartimento di Pediatria, Ospedale di Monfalcone, Monfalcone, Italy*

<sup>6</sup>*IRCCS Burlo Garofolo, Childrens Hospital Trieste, Italy*

Figure S1

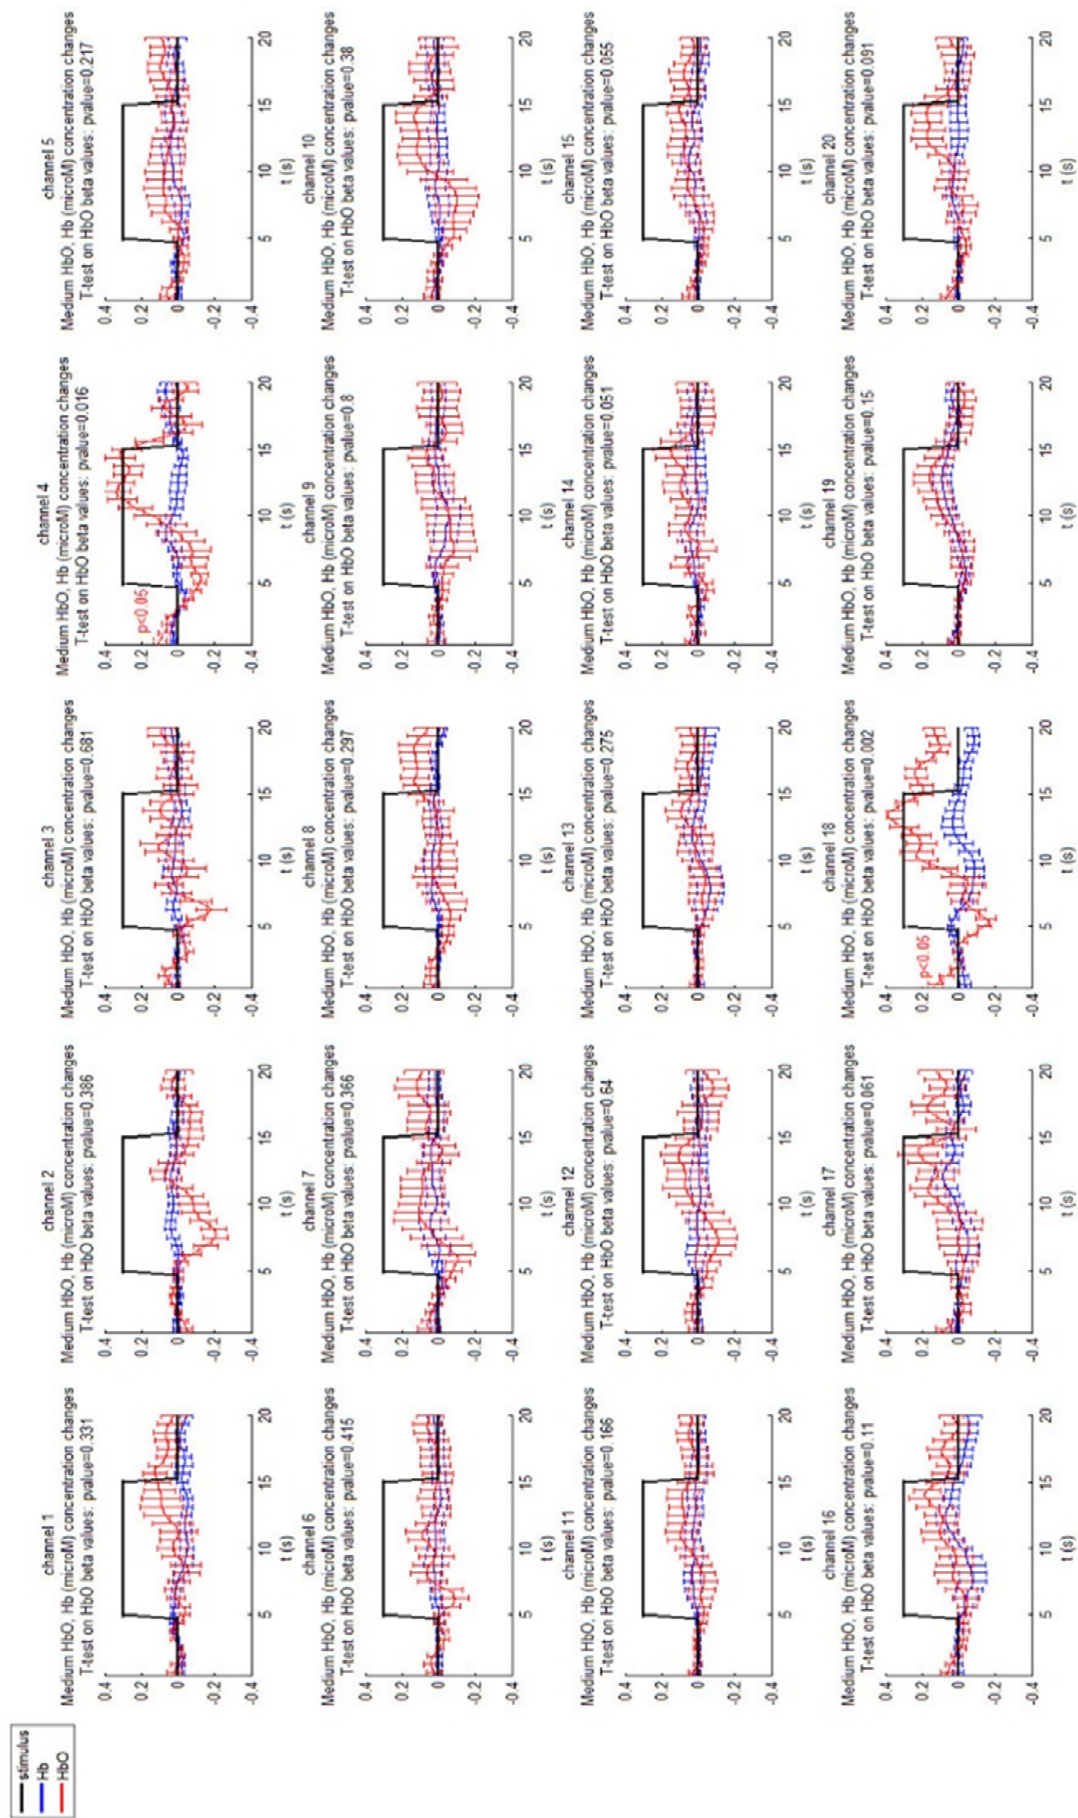

Figure S2

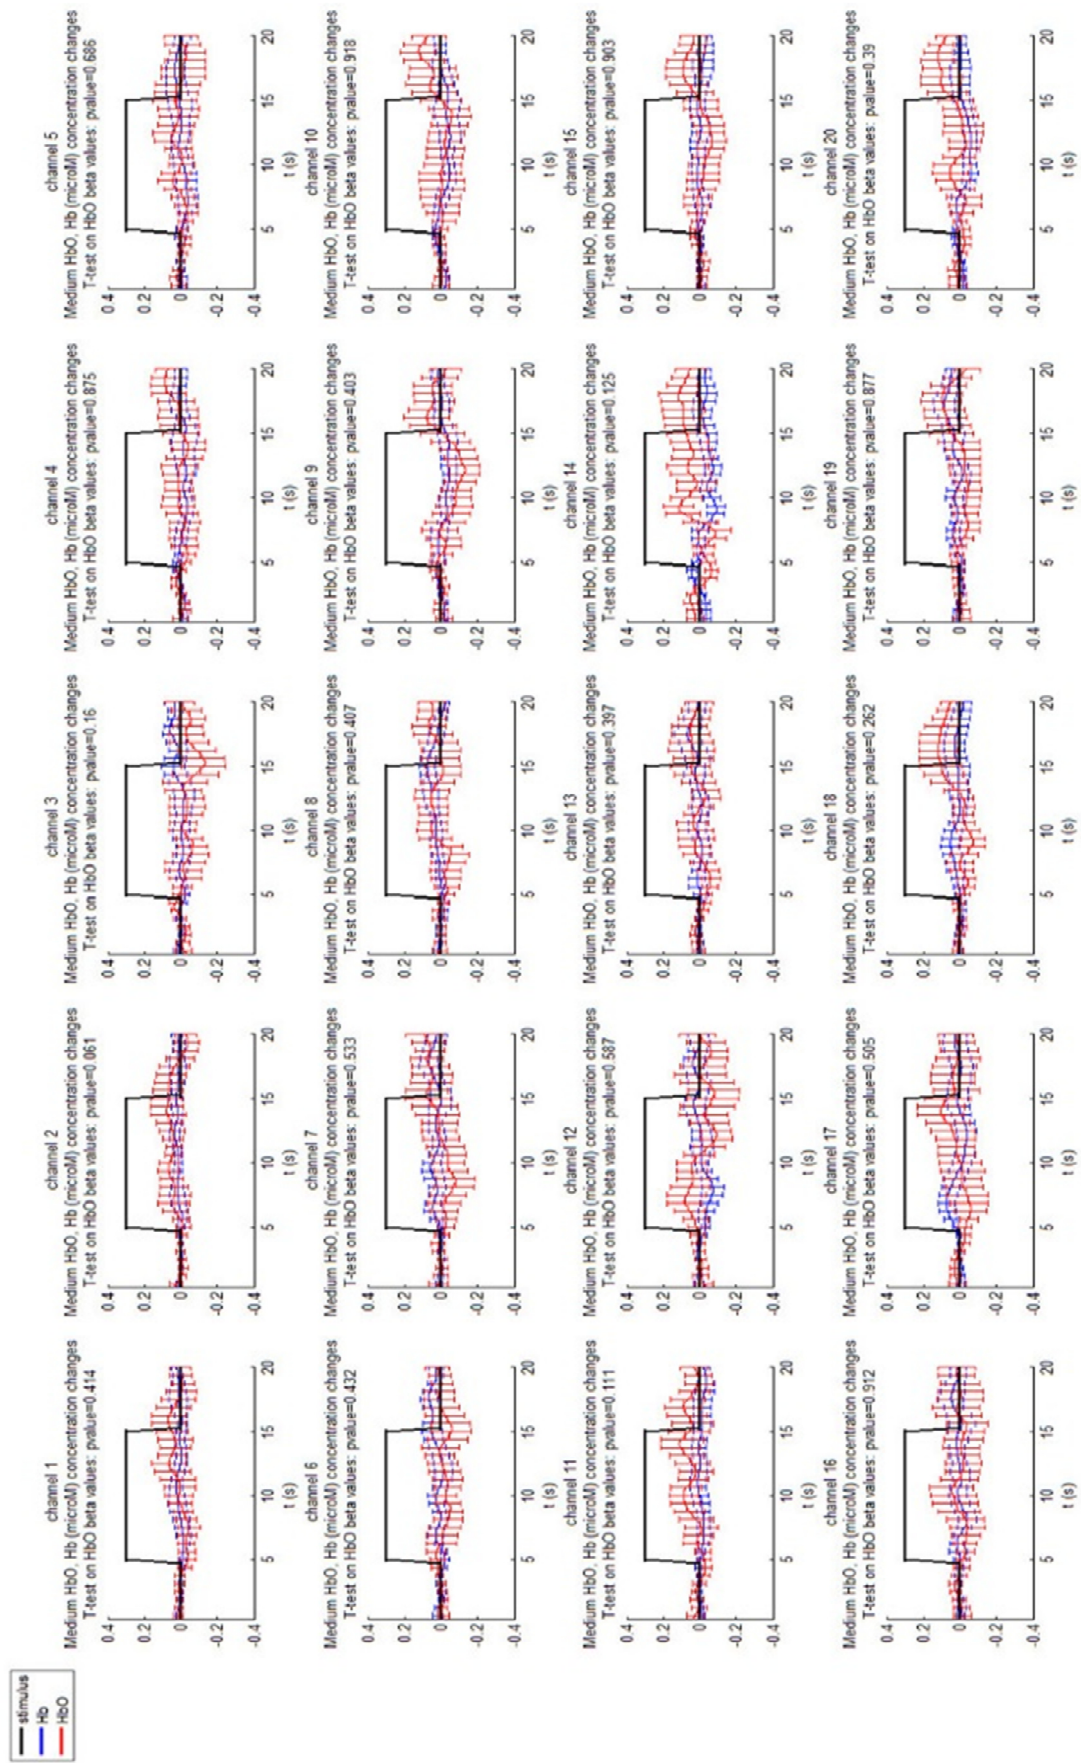



Figure S3

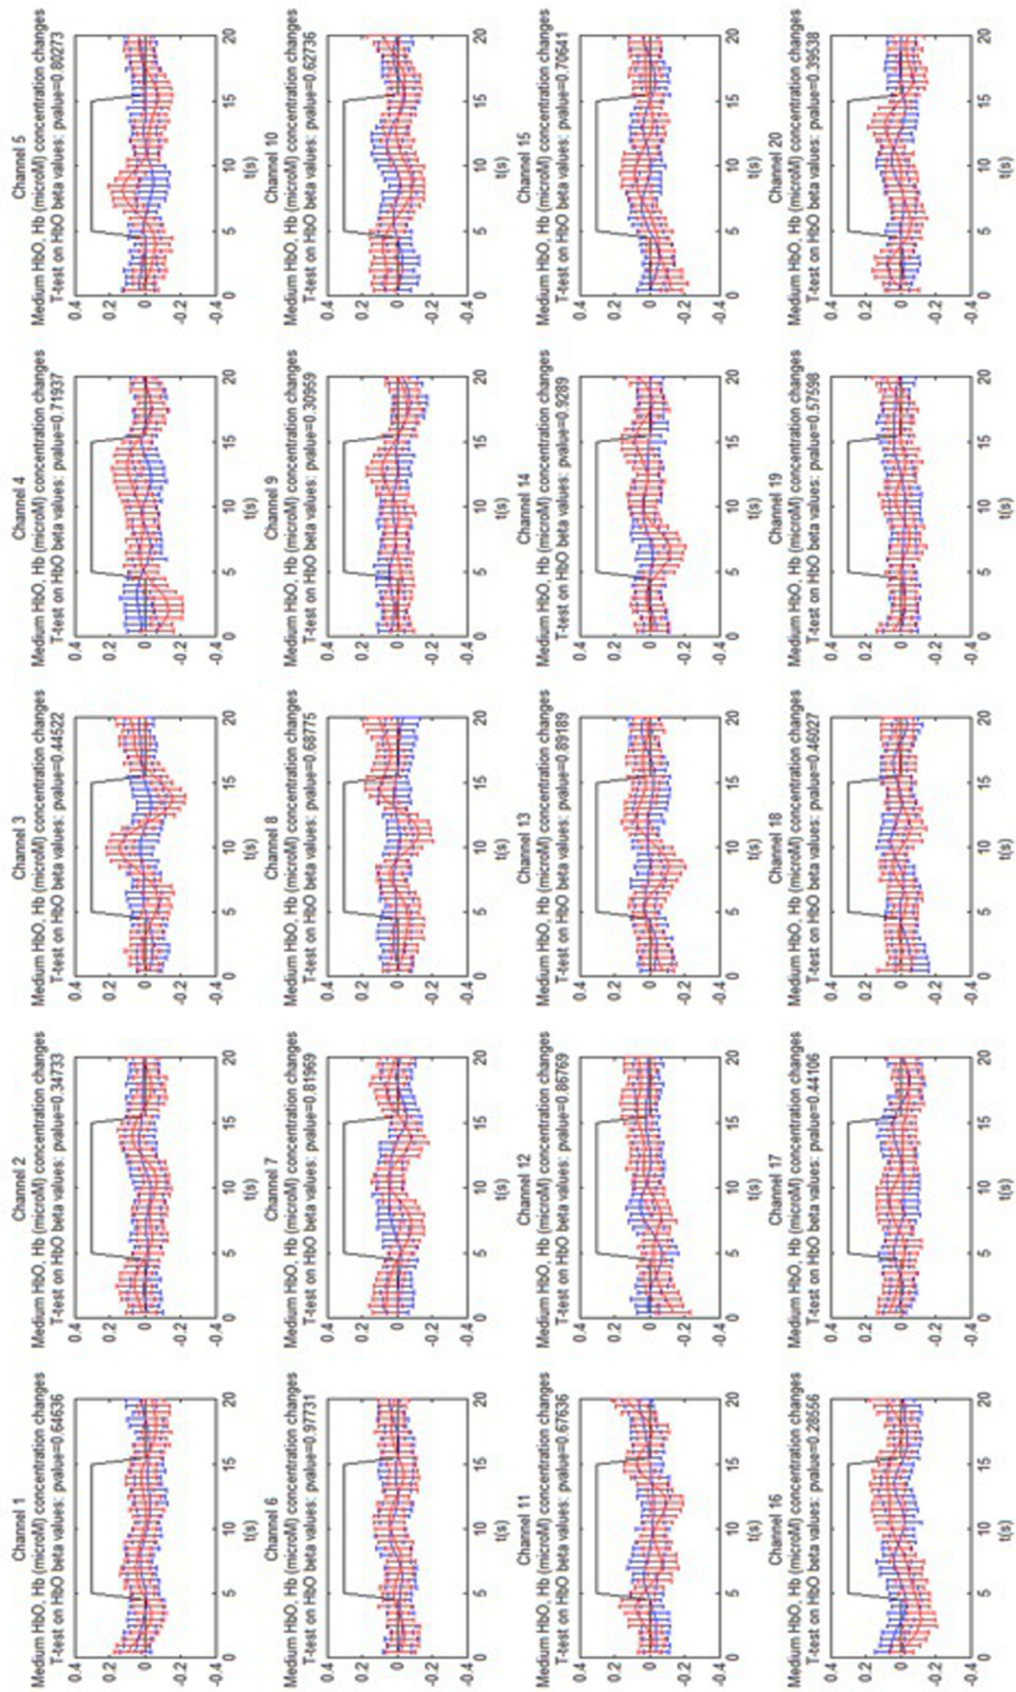

Figure S4

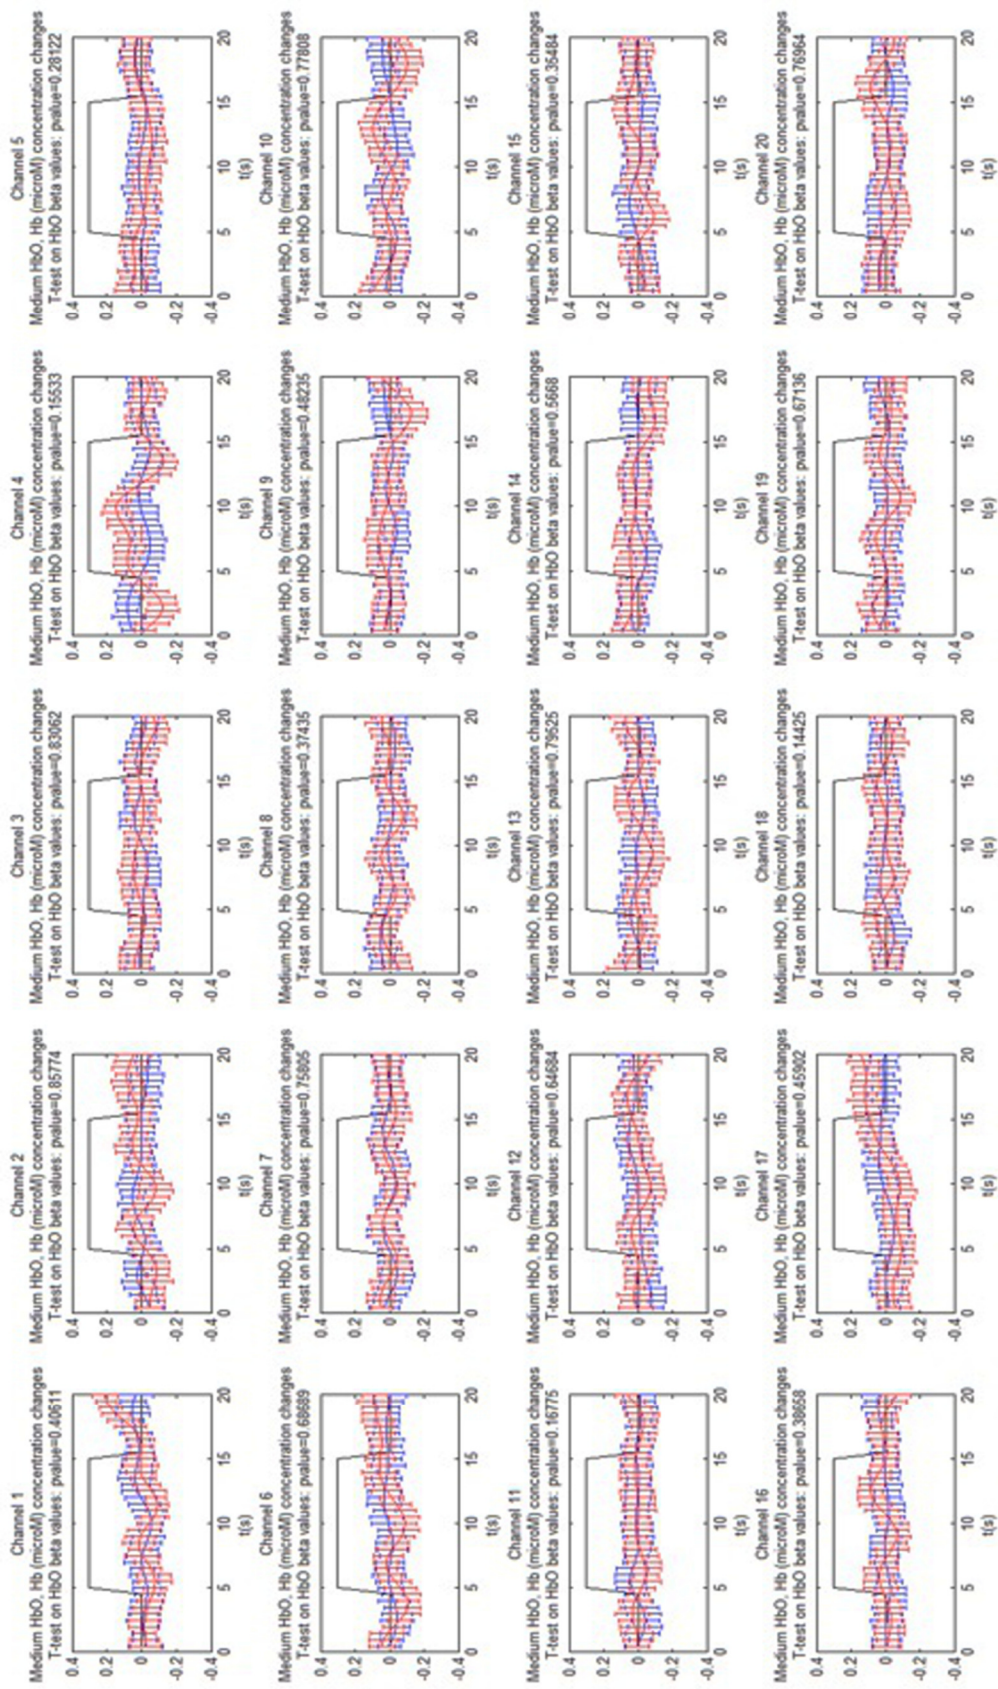

## Supplementary Figure Legends

**Figure S1:** Average time course changes in HbO<sub>2</sub> and HHb concentration ( $\mu\text{M}$ ),  $\pm\text{SEM}$  (Standard Error of the Mean), for each source–detector couple, in response to H-F stimulus.

**Figure S2:** Average time course changes in HbO<sub>2</sub> and HHb concentration ( $\mu\text{M}$ ) for each source–detector couple, in response to M stimulus in Experiment 1.

**Figure S3:** Average time course changes in HbO<sub>2</sub> and HHb concentration ( $\mu\text{M}$ ),  $\pm\text{SEM}$  (Standard Error of the Mean), for each source–detector couple, in response to H-A stimulus.

**Figure S4:** Average time course changes in HbO<sub>2</sub> and HHb concentration ( $\mu\text{M}$ ) for each source–detector couple, in response to M stimulus in Experiment 2.
